# Supplementary material for: Graphene-supported TiO2 nanospheres as a high-capacity and long-cycle life anode for sodium ion batteries
Source: Royal Society of Chemistry journal article supplement (doi:10.1039/c6ta04402f), 2016-01-01
Supplement: c6ta04402f1.pdf [file c6ta04402f1.pdf]

Electronic Supplementary Information

## Graphene-supported TiO<sub>2</sub> nanospheres as high-capacity and long-cycle life anode material for sodium ion batteries

Ya Xiong,<sup>a</sup> Jiangfeng Qian,<sup>a</sup> Yuliang Cao,<sup>a</sup> Xinping Ai,<sup>a</sup> Hanxi Yang<sup>\*a</sup>

### 1. Preparation of rGO-TiO<sub>2</sub>

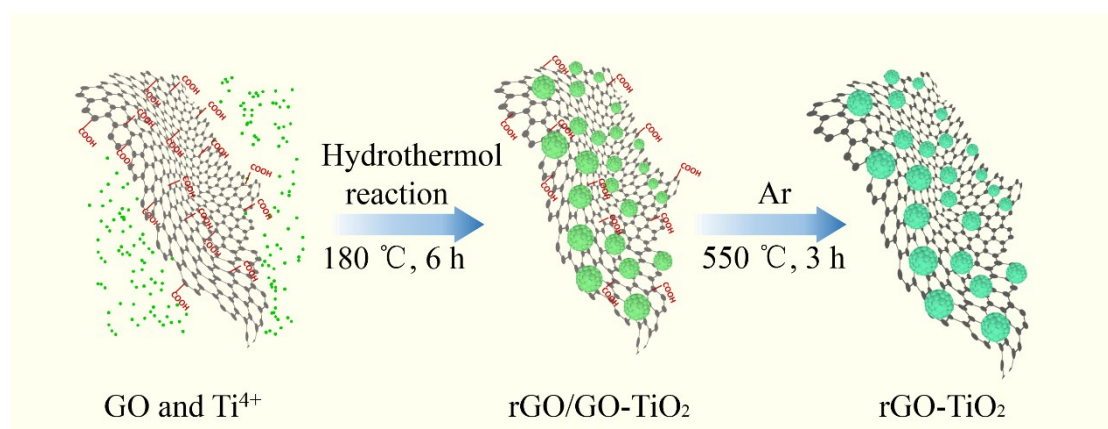

Figure S1. Schematic illustration of the formation process of the rGO-TiO<sub>2</sub>

### 2. Morphological characterization of the b-TiO<sub>2</sub> and rGO-TiO<sub>2</sub> synthesized at different conditions

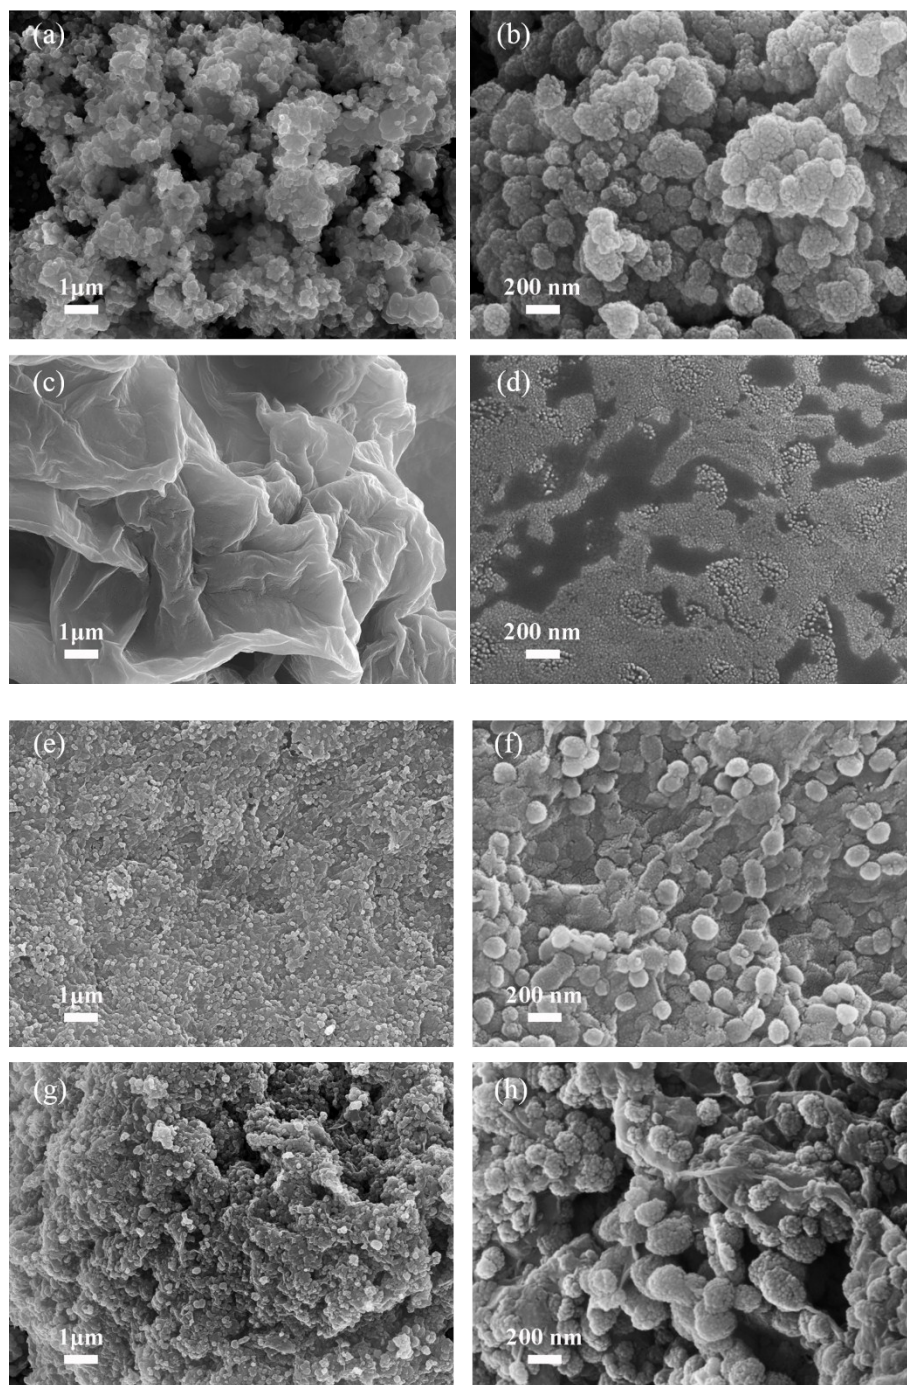

**Figure S2.** SEM images of the reference materials synthesized at different times and temperature: (a) and (b). 180 °C for 6 h without GO; (c) and (d). 100 °C for 6 h; (e) and (f). 180 °C for 3 h; (g) and (h). 180 °C for 12 h

### 3. Na-storage capacities of the reference b-TiO<sub>2</sub>

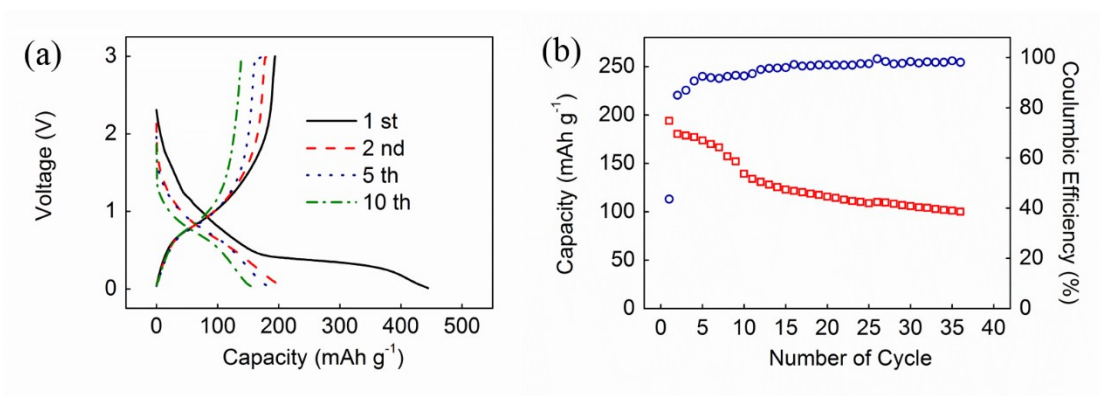

**Figure S3.** (a) Charge/discharge profiles of the b-TiO<sub>2</sub>; (b) Cyclability performance of b-TiO<sub>2</sub>

#### 4. Cycling performance of rGO-TiO<sub>2</sub>

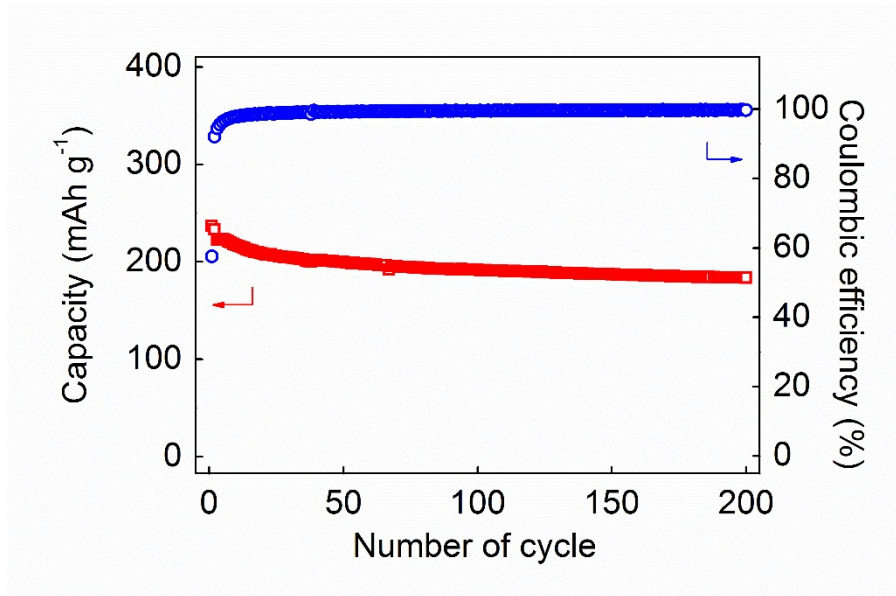

**Figure S4.** Cycling performance of rGO-TiO<sub>2</sub> anode at a constant current of 200 mA g<sup>-1</sup>

#### 5. Morphological characterization of the rGO-TiO<sub>2</sub> after cycling.

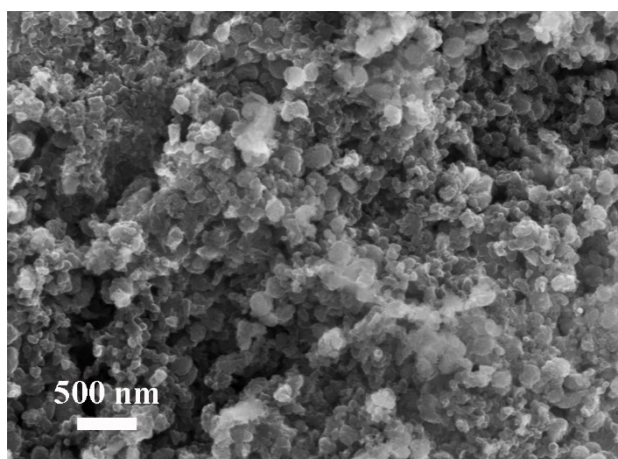

**Figure S5.** SEM image of the rGO-TiO<sub>2</sub> electrode taken from the cells after cycling for 300 cycles.
